# Supplementary material
Source: PubMed Central journal article supplement (PMC3367223)
Supplement: jcbfm201224x1.pdf [file jcbfm201224x1.pdf]

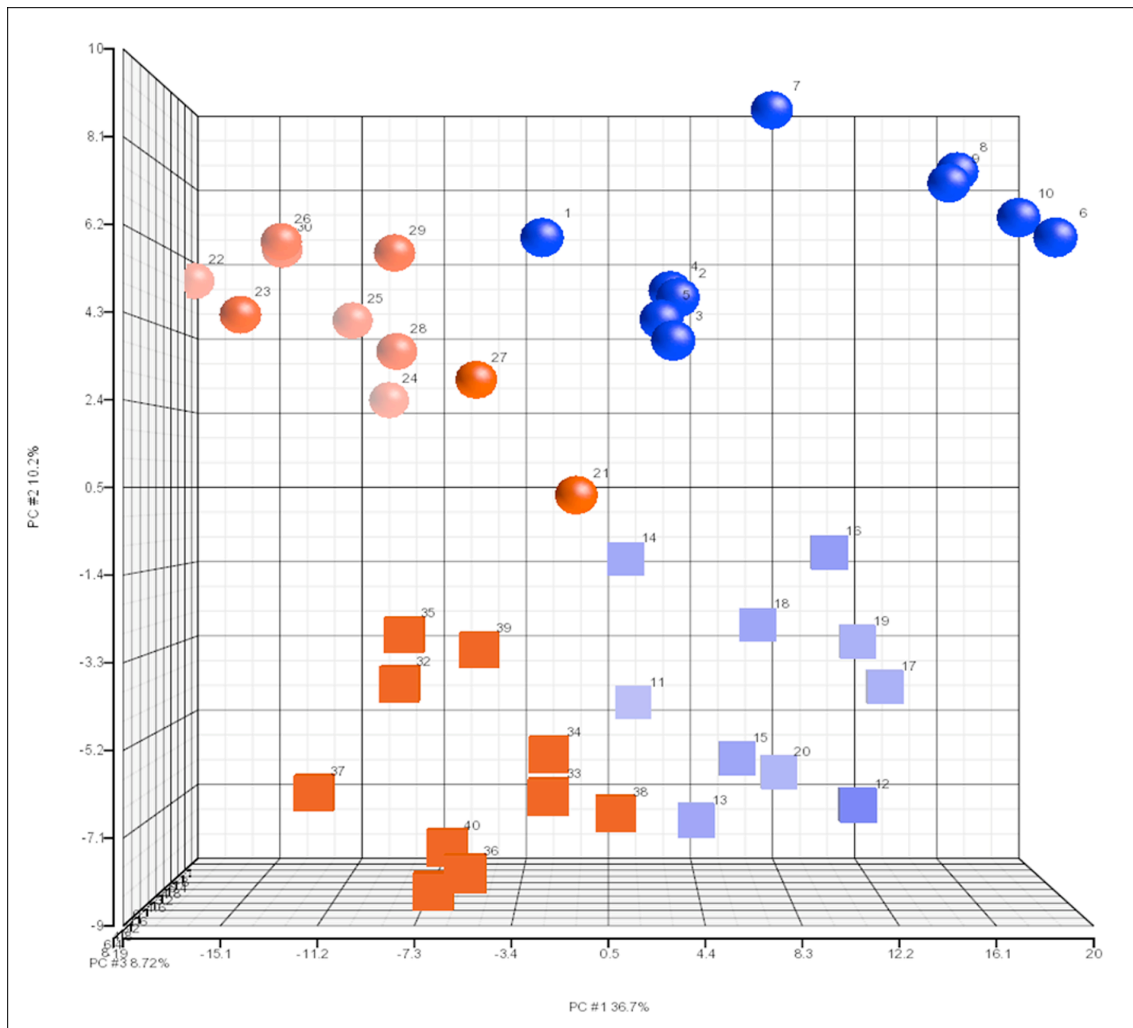

**Supplementary Figure. Illustration of the gene expression differences between IS cases and controls.** 3D PCA plot of the analyzed samples, obtained using the probe sets differentially expressed between IS cases and controls with a threshold of 1.2-fold change and an uncorrected  $P < 0.01$ . IS cases (red symbols) are separated from controls (blue symbols) in the first principal component (PC#1). The second principal component (PC#2) discriminates males (cubes) and females (spheres). Figure produced with the Partek software.
